# Supplementary material for: Enhanced enrichment performance of nickel oxide nanoparticles via fabrication of a nanocomposite with a graphene template
Source: Royal Society of Chemistry journal article supplement (doi:10.1039/c4ra17299j), 2015-01-01
Supplement: c4ra17299j1.pdf [file c4ra17299j1.pdf]

*Supporting Information for*

**Enhanced Enrichment Performance of Nickel oxide Nanoparticles via  
Fabrication of Nanocomposite with Graphene Template**

Batool Fatima<sup>1,2</sup>, Fahmida Jabeen<sup>1</sup>, Zahra Padashbarmchi<sup>3</sup>, Muhammad Najam-ul-Haq<sup>1\*</sup>

<sup>1</sup>: Division of Analytical Chemistry, Institute of Chemical Sciences, Bahauddin Zakariya University, Multan 60800, Pakistan.

<sup>2</sup>: Australian Institute for Bioengineering and Nanotechnology, The University of Queensland, Brisbane, QLD 4072, Australia

<sup>3</sup>: Department of Environmental Sciences, Faculty of Natural Resources, University of Tehran, 31585-4314, Karaj, Iran

\* Corresponding Author

Dr. M. Najam-ul-Haq  
Institute of Chemical Sciences  
Bahauddin Zakariya University  
Multan 60800 Pakistan  
Tel.: +92 306 7552653  
Email: [najamulhaq@bzu.edu.pk](mailto:najamulhaq@bzu.edu.pk)

### **Preparation of HeLa Cell Extract**

HeLa cells were cultured in high glucose Dulbecco's modified Eagle's medium, supplemented with 10% fetal bovine serum, 100 U/mL penicillin and 100 U/mL streptomycin. The cells were cultivated on 150 mm tissue culture plastic dishes at 37 °C in 5% CO<sub>2</sub> and 98% humidity. For total cell lysate preparation, cells were washed twice in ice cold PBS, harvested and centrifuged at 500xg for 4 min at 4 °C. Cells collected from 15 cm dish were re-suspended in 1 mL of lysis buffer (50 mM Tris-HCl, pH 8.0), 0.5% Triton X100, 150 mM NaCl, 5 mM MgCl<sub>2</sub>, 1 mM DTT, 10 mg/mL leupeptin, 10 mg/mL aprotinin and 1 mM PMSF. Lysis was performed for 30 min at 4 °C followed by the centrifugation at 16000xg for 10 min at 4 °C. Protein concentration was determined using Coomassie Plus Protein Assay (Thermo Scientific).

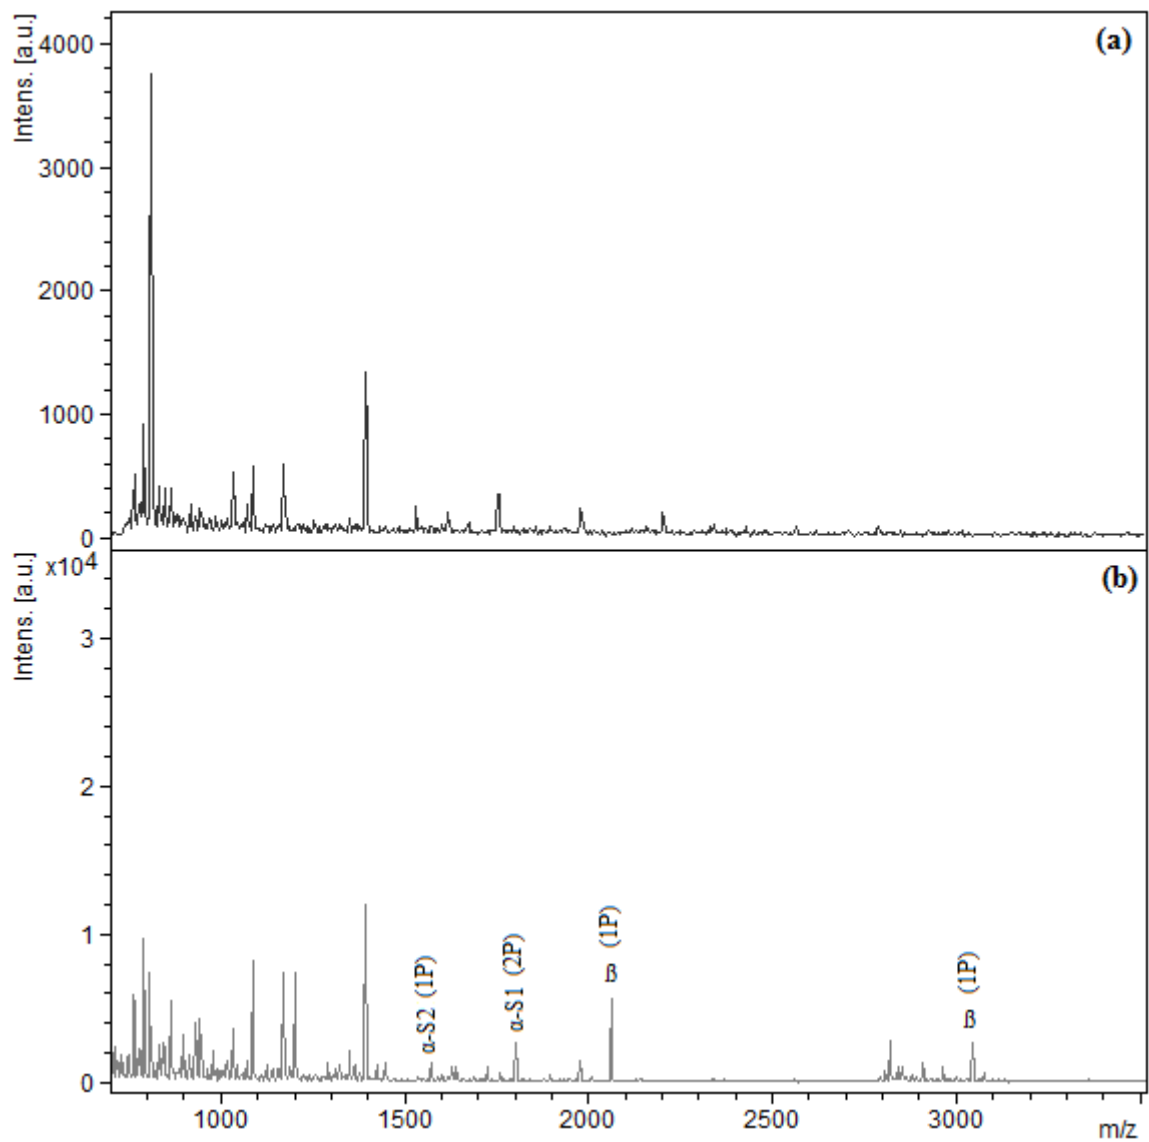

**Fig. S1** MALDI-MS spectra eluted fractions after applying  $\beta$ -casein digest to (a) graphene nanofoam and (b) derivatized graphene nanofoam with orthosilicate.  $\alpha$ S1,  $\alpha$ S2 and  $\beta$  represents the detected phosphopeptides with status of phosphorylation given in brackets.

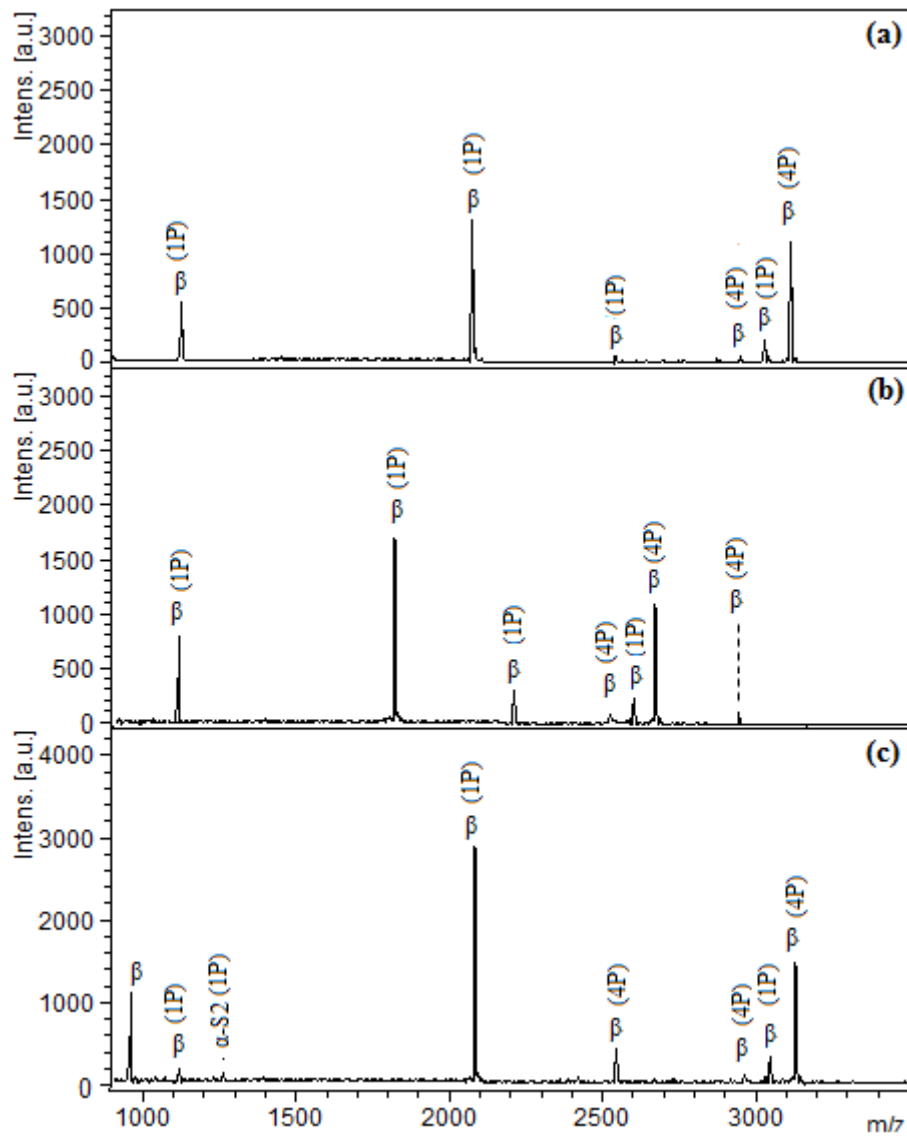

**Fig. S2** Comparison of metal oxides nanoparticles using  $\beta$ -casein digest for (a) zirconia NPs (b) titania NPs and (c) nickel oxide NPs.  $\alpha$ S2 and  $\beta$  represents the detected phosphopeptides with status of phosphorylation given in brackets.

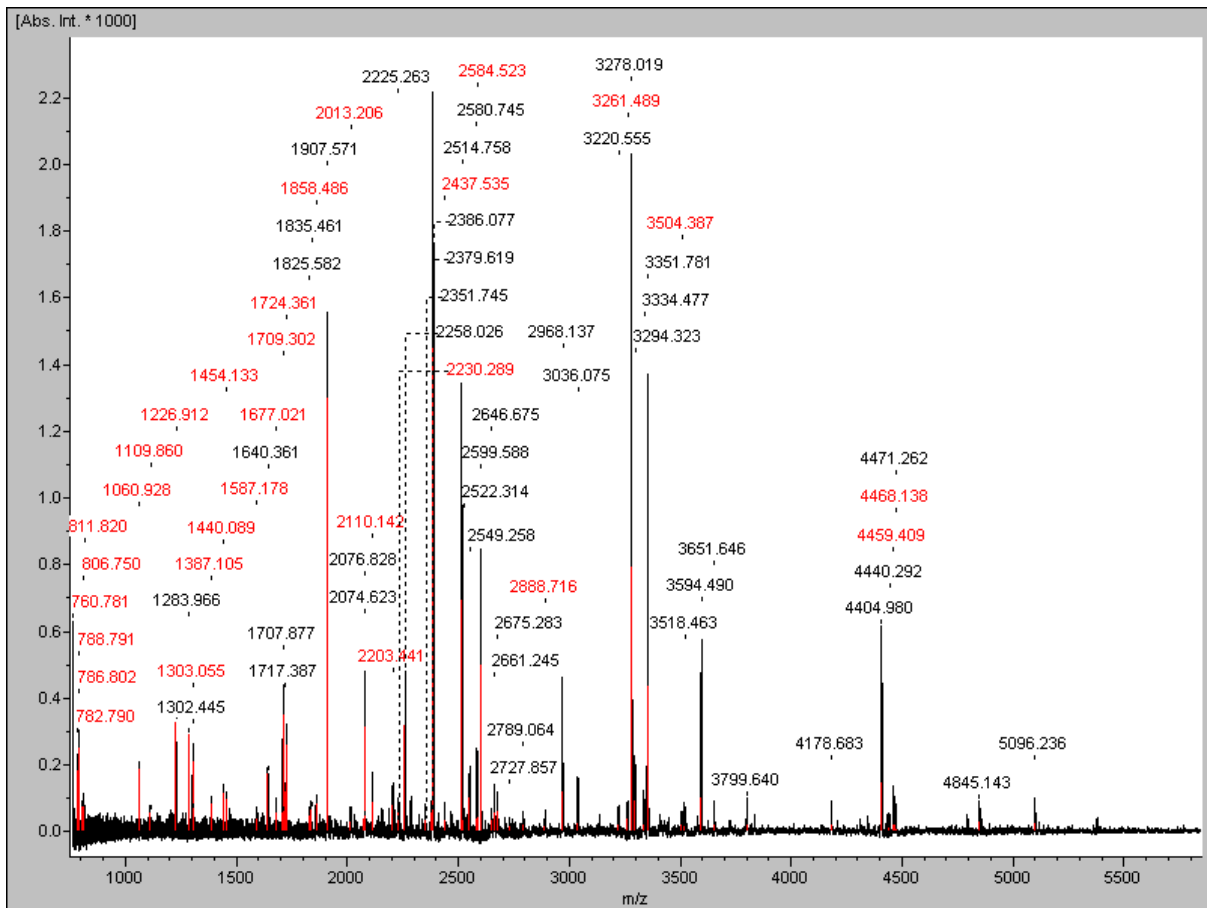

**Fig. S3** Serum phosphopeptides analysis using graphene-NiO nanocomposite.

**Table S1** Serum analysis using graphene-NiO nanocomposite using MALDI-MS. Search parameters are Charge=1+, MS Tol.:0.200000 Da, Trypsin, Mascot 2.4.1, SwissProt database, modifications: Global: Carboxymethyl (C), Optional: Oxidation (M), Phospho (ST), Phospho (Y).

| Tree hierarchy                                                                                                 | Meas. M/z | Calc. MH+ | Int.     | Dev. (Da) | Dev. (ppm) | Range     | P | Sequence                                                                                                                                                               |
|----------------------------------------------------------------------------------------------------------------|-----------|-----------|----------|-----------|------------|-----------|---|------------------------------------------------------------------------------------------------------------------------------------------------------------------------|
| <b>Apoptosis-associated speck-like protein containing a CARD OS=Homo sapiens GN=PYCARD PE=1 SV=2 ASC_HUMAN</b> |           |           |          |           |            |           |   |                                                                                                                                                                        |
| peak 37                                                                                                        | 2386.077  | 2385.976  | 1458.721 | 0.1       | 42.079     | 140 - 158 | 1 | VLTDEQYQAVRAEPTNPSK 3: Phospho (ST) 7: Phospho (Y) 15: Phospho (ST)                                                                                                    |
| peak 46                                                                                                        | 2661.245  | 2661.293  | 54.613   | -0.048    | -18.072    | 162 - 182 | 1 | LFSFTPawnwTCKDLLLQALR 3: Phospho (ST) 12: Carboxymethyl (C)                                                                                                            |
| peak 64                                                                                                        | 4178.683  | 4178.625  | 22.425   | 0.058     | 13.896     | 42 - 74   | 1 | GALLSMDALDLTDKLVSFYLETYGAELTANVLR 5: Phospho (ST) 6: Oxidation (M) 12: Phospho (ST) 17: Phospho (ST) 19: Phospho (Y) 22: Phospho (ST) 23: Phospho (Y) 28: Phospho (ST) |
| peak 70                                                                                                        | 4845.143  | 4845.146  | 27.769   | -0.003    | -0.61      | 75 - 119  | 0 | DMGLQEMAGQLQAATHQGSAAAPAGIQAPPQSAAKPGLHFIDQHR 2: Oxidation (M) 15: Phospho (ST) 19: Phospho (ST) 32: Phospho (ST)                                                      |
| <b>Voltage-dependent calcium channel gamma-2 subunit OS=Homo sapiens GN=CACNG2 PE=1 SV=1 CCG2_HUMAN</b>        |           |           |          |           |            |           |   |                                                                                                                                                                        |
| peak 21                                                                                                        | 1717.387  | 1717.446  | 118.951  | -0.058    | -34.009    | 239 - 250 | 1 | SSSRSTEPSSHR 1: Phospho (ST) 2: Phospho (ST) 3: Phospho (ST) 5: Phospho (ST) 6: Phospho (ST)                                                                           |
| peak 26                                                                                                        | 1907.571  | 1907.734  | 1303.449 | -0.163    | -85.504    | 243 - 258 | 1 | STEPSSRDASPVGIK 1: Phospho (ST) 2: Phospho (ST) 5: Phospho (ST)                                                                                                        |
| peak 29                                                                                                        | 2076.828  | 2076.875  | 314.598  | -0.047    | -22.811    | 259 - 275 | 0 | GFNTLPSTEISMYTLR 4: Phospho (ST) 13: Phospho (Y)                                                                                                                       |
| peak 61                                                                                                        | 3594.49   | 3594.627  | 101.445  | -0.137    | -38.076    | 100 - 129 | 1 | AVRASSIFPILSVILLFMGGLCIAASEFYK 5: Phospho (ST) 6: Phospho (ST) 12: Phospho (ST) 29: Phospho (Y) 22: Carboxymethyl (C)                                                  |
| <b>IQ domain-containing protein K OS=Homo sapiens GN=IQCK PE=2 SV=1 IQCK_HUMAN</b>                             |           |           |          |           |            |           |   |                                                                                                                                                                        |
| peak 41                                                                                                        | 2549.258  | 2549.086  | 103.974  | 0.172     | 67.467     | 162 - 180 | 1 | TKFIACDFLTEWLYNQNP 1: Phospho (ST) 14: Phospho (Y) 6: Carboxymethyl (C)                                                                                                |
| peak 47                                                                                                        | 2675.283  | 2675.275  | 60.218   | 0.008     | 3.174      | 14 - 37   | 1 | LKPCSTDSFTRTPVPTVSLASR 4: Phospho (ST) 5: Carboxymethyl (C)                                                                                                            |
| peak 58                                                                                                        | 3351.781  | 3351.585  | 436.235  | 0.196     | 58.582     | 125 - 152 | 1 | TCSPKEYLETFFIPVLLPGMASLLHQAK 1: Phospho (ST) 7: Phospho (Y) 2: Carboxymethyl (C)                                                                                       |
| peak 71                                                                                                        | 5096.236  | 5096.122  | 24.316   | 0.114     | 22.37      | 77 - 117  | 1 | QEPVITVAPVEEMLFHGFSAEHYFPVSHFTMISRTPCPQDK 6: Phospho (ST) 13: Oxidation (M) 19: Phospho (ST) 23: Phospho (Y) 27: Phospho (ST) 37: Carboxymethyl (C)                    |
| <b>Histatin-1 OS=Homo sapiens GN=HTN1 PE=1 SV=2 HIS1_HUMAN</b>                                                 |           |           |          |           |            |           |   |                                                                                                                                                                        |
| peak 51                                                                                                        | 2968.137  | 2968.326  | 118.621  | -0.19     | -63.971    | 24-Jan    | 1 | MKFFVFALVLAALMISMISADSHEK 15: Phospho (ST) 18: Phospho (ST) 21: Phospho (ST)                                                                                           |

|                                                                                                       |          |          |         |        |         |           |                                                                                                                                         |
|-------------------------------------------------------------------------------------------------------|----------|----------|---------|--------|---------|-----------|-----------------------------------------------------------------------------------------------------------------------------------------|
| <b>Leucine zipper putative tumor suppressor 2 OS=Homo sapiens GN=LZTS2 PE=1 SV=2 LZTS2_HUMAN</b>      |          |          |         |        |         |           |                                                                                                                                         |
| <b>peak 23</b>                                                                                        | 1825.582 | 1825.76  | 47.586  | -0.178 | -97.664 | 616 - 627 | 1 QLQHNYIQMYRR 6: Phospho (Y) 9: Oxidation (M) 10: Phospho (Y)                                                                          |
| <b>Dynactin subunit 5 OS=Homo sapiens GN=DCTN5 PE=1 SV=1 DCTN5_HUMAN</b>                              |          |          |         |        |         |           |                                                                                                                                         |
| <b>peak 49</b>                                                                                        | 2789.064 | 2788.991 | 22.117  | 0.073  | 26.111  | 21-Jan    | 1 MELGELLYNKSEYIETASGNK 8: Phospho (Y) 11: Phospho (ST) 13: Phospho (Y) 16: Phospho (ST) 18: Phospho (ST)                               |
| <b>Mitoferrin-1 OS=Homo sapiens GN=SLC25A37 PE=2 SV=2 MFRN1_HUMAN</b>                                 |          |          |         |        |         |           |                                                                                                                                         |
| <b>peak 19</b>                                                                                        | 1707.877 | 1707.728 | 54.734  | 0.149  | 87.104  | 15-Jan    | 1 MELRSGSVGSQAVAR 5: Phospho (ST) 7: Phospho (ST)                                                                                       |
| <b>peak 65</b>                                                                                        | 4404.98  | 4404.981 | 145.837 | -0.001 | -0.188  | 130 - 168 | 1 RTLNDVVFHHQGNSHLANGIAGSMATLLHDAVMNPAEVVK 2: Phospho (ST) 13: Phospho (ST) 22: Phospho (ST)                                            |
| <b>Photoreceptor-specific nuclear receptor OS=Homo sapiens GN=NR2E3 PE=1 SV=1 NR2E3_HUMAN</b>         |          |          |         |        |         |           |                                                                                                                                         |
| <b>peak 56</b>                                                                                        | 3294.323 | 3294.45  | 91.493  | -0.127 | -38.603 | 126 - 155 | 0 STAQVHLDSMESNTESRPESLVAPPAPAGR 1: Phospho (ST) 2: Phospho (ST)                                                                        |
| <b>Protein Mpv17 OS=Homo sapiens GN=MPV17 PE=1 SV=1 MPV17_HUMAN</b>                                   |          |          |         |        |         |           |                                                                                                                                         |
| <b>peak 40</b>                                                                                        | 2522.314 | 2522.197 | 32.04   | 0.117  | 46.272  | 49 - 71   | 1 GRTLTMVSLGCGFVGPVVGWYK 22: Phospho (Y) 11: Carboxymethyl (C)                                                                          |
| <b>Mid1-interacting protein 1 OS=Homo sapiens GN=MID1IP1 PE=1 SV=1 MIIP1_HUMAN</b>                    |          |          |         |        |         |           |                                                                                                                                         |
| <b>peak 53</b>                                                                                        | 3220.555 | 3220.481 | 18.235  | 0.074  | 23.028  | 67 - 95   | 1 TPPVPDSGSANGSFFAPSRDMYSHYVLLK 22: Phospho (Y)                                                                                         |
| <b>Melanoma-associated antigen 9 OS=Homo sapiens GN=MAGEA9 PE=2 SV=1 MAGA9_HUMAN</b>                  |          |          |         |        |         |           |                                                                                                                                         |
| <b>peak 34</b>                                                                                        | 2258.026 | 2257.993 | 321.492 | 0.033  | 14.758  | 243 - 258 | 1 KLLTQDWVQENYLEYR 12: Phospho (Y) 15: Phospho (Y)                                                                                      |
| <b>peak 42</b>                                                                                        | 2580.745 | 2580.942 | 37.307  | -0.197 | -76.309 | 296 - 315 | 0 EPICYPSLYEEVLGEEQEGV 5: Phospho (Y) 7: Phospho (ST) 9: Phospho (Y) 4: Carboxymethyl (C)                                               |
| <b>Rab11 family-interacting protein 1 OS=Homo sapiens GN=RAB11FIP1 PE=1 SV=3 RFIPI_HUMAN</b>          |          |          |         |        |         |           |                                                                                                                                         |
| <b>peak 11</b>                                                                                        | 1302.445 | 1302.551 | 60.579  | -0.106 | -81.455 | 666 - 676 | 1 GTEDSLMGRTR 2: Phospho (ST)                                                                                                           |
| <b>peak 24</b>                                                                                        | 1835.461 | 1835.513 | 67.502  | -0.052 | -28.152 | 337 - 350 | 1 DSSPSSSPSPKGFR 2: Phospho (ST) 3: Phospho (ST) 5: Phospho (ST) 6: Phospho (ST) 7: Phospho (ST)                                        |
| <b>peak 28</b>                                                                                        | 2074.623 | 2074.774 | 39.488  | -0.151 | -72.784 | 658 - 674 | 1 QPSFPANKGTEDSLMGR 3: Phospho (ST) 10: Phospho (ST) 13: Phospho (ST)                                                                   |
| <b>peak 49</b>                                                                                        | 2789.064 | 2789.083 | 22.117  | -0.019 | -6.99   | 949 - 971 | 0 SPIMADLNLSLPSIPEVASDDER 1: Phospho (ST) 10: Phospho (ST) 13: Phospho (ST) 19: Phospho (ST)                                            |
| <b>Protein Wnt-2 OS=Homo sapiens GN=WNT2 PE=1 SV=1 WNT2_HUMAN</b>                                     |          |          |         |        |         |           |                                                                                                                                         |
| <b>peak 48</b>                                                                                        | 2727.857 | 2727.95  | 16.255  | -0.093 | -34.18  | 208 - 228 | 1 CHGVSGSCTLRTCWLAMADFR 5: Phospho (ST) 7: Phospho (ST) 9: Phospho (ST) 1: Carboxymethyl (C) 8: Carboxymethyl (C) 13: Carboxymethyl (C) |
| <b>peak 66</b>                                                                                        | 4440.292 | 4440.186 | 9.216   | 0.106  | 23.898  | Jan-38    | 1 MNAPLGGIWLWLPLLLTWTPEVNSSWWYMRATGGSSR 29: Phospho (Y)                                                                                 |
| <b>UDP-glucose 4-epimerase OS=Homo sapiens GN=GALE PE=1 SV=2 GALE_HUMAN</b>                           |          |          |         |        |         |           |                                                                                                                                         |
| <b>peak 32</b>                                                                                        | 2225.263 | 2225.116 | 28.293  | 0.147  | 65.873  | 107 - 125 | 1 VNLTGTIQLLEIMKAHGK 4: Phospho (ST) 6: Phospho (ST)                                                                                    |
| <b>Centriole, cilia and spindle-associated protein OS=Homo sapiens GN=CCSAP PE=1 SV=2 CCSAP_HUMAN</b> |          |          |         |        |         |           |                                                                                                                                         |

|                                                                                                                                  |           |           |          |        |         |           |   |                                                                                                                                                             |
|----------------------------------------------------------------------------------------------------------------------------------|-----------|-----------|----------|--------|---------|-----------|---|-------------------------------------------------------------------------------------------------------------------------------------------------------------|
| <b>peak 45</b>                                                                                                                   | 2646.675  | 2646.818  | 33.085   | -0.143 | -54.053 | 251 - 269 | 1 | ASSSENPWMTEYMRCYSAR 2: Phospho (ST) 3: Phospho (ST) 12: Phospho (Y) 16: Phospho (Y) 15: Carboxymethyl (C)                                                   |
| <b>Protein FAM131A OS=Homo sapiens GN=FAM131A PE=2 SV=1 F131A_HUMAN</b>                                                          |           |           |          |        |         |           |   |                                                                                                                                                             |
| <b>peak 62</b>                                                                                                                   | 3651.646  | 3651.504  | 20.979   | 0.141  | 38.705  | 264 - 295 | 0 | SLGPLEAQDSLINSPLTESCLSPAEEEEPAPCK 1: Phospho (ST) 12: Phospho (Y) 20: Carboxymethyl (C) 31: Carboxymethyl (C)                                               |
| <b>Olfactory receptor 52E5 OS=Homo sapiens GN=OR52E5 PE=3 SV=2 O52E5_HUMAN</b>                                                   |           |           |          |        |         |           |   |                                                                                                                                                             |
| <b>peak 60</b>                                                                                                                   | 3518.463  | 3518.297  | 17.744   | 0.165  | 47.038  | 236 - 262 | 0 | ALSTCGSHVCVMLAFYLPALFSFMTHR 3: Phospho (ST) 4: Phospho (ST) 7: Phospho (ST) 16: Phospho (Y) 22: Phospho (ST) 5: Carboxymethyl (C) 10: Carboxymethyl (C)     |
| <b>Multifunctional protein ADE2 OS=Homo sapiens GN=PAICS PE=1 SV=3 PUR6_HUMAN</b>                                                |           |           |          |        |         |           |   |                                                                                                                                                             |
| <b>peak 37</b>                                                                                                                   | 2386.077  | 2386.209  | 1458.721 | -0.132 | -55.311 | 54 - 74   | 1 | AAISNKITSCIFQLLQEAGIK 4: Phospho (ST) 10: Carboxymethyl (C)                                                                                                 |
| <b>peak 63</b>                                                                                                                   | 3799.64   | 3799.688  | 21.877   | -0.048 | -12.563 | 368 - 401 | 0 | LPSGLGCSTVLSPEGSAQFAAQIFGLSNHLVWSK 3: Phospho (ST) 8: Phospho (ST) 9: Phospho (ST) 7: Carboxymethyl (C)                                                     |
| <b>BTB/POZ domain-containing protein KCTD14 OS=Homo sapiens GN=KCTD14 PE=1 SV=2 KCD14_HUMAN</b>                                  |           |           |          |        |         |           |   |                                                                                                                                                             |
| <b>peak 52</b>                                                                                                                   | 3036.075  | 3036.274  | 24.735   | -0.199 | -65.714 | 28 - 52   | 0 | RPTMSTVVELNVGGEFHTTTLGTLR 3: Phospho (ST) 5: Phospho (ST) 6: Phospho (ST) 18: Phospho (ST)                                                                  |
| <b>N-acetyllactosaminide beta-1,6-N-acetylglucosaminyl-transferase, isoform B OS=Homo sapiens GN=GCNT2 PE=2 SV=1 GNT2B_HUMAN</b> |           |           |          |        |         |           |   |                                                                                                                                                             |
| <b>peak 69</b>                                                                                                                   | 4471.262  | 4471.126  | 8.72     | 0.136  | 30.384  | 74 - 110  | 1 | EYLTQSHYITAPLSKEEADFPPLAYIMVIHHHFDTFAR 2: Phospho (Y)                                                                                                       |
| <b>Putative uncharacterized protein encoded by LINC00474 OS=Homo sapiens GN=LINC00474 PE=5 SV=2 CI027_HUMAN</b>                  |           |           |          |        |         |           |   |                                                                                                                                                             |
| <b>peak 55</b>                                                                                                                   | 3278.019  | 3278.101  | 794.277  | -0.082 | -24.926 | 26 - 51   | 1 | TSNWGSSSFSEKSGCMQTHPSMNLDCR 1: Phospho (ST) 2: Phospho (ST) 6: Phospho (ST) 15: Oxidation (M) 21: Oxidation (M) 14: Carboxymethyl (C) 25: Carboxymethyl (C) |
| <b>Tumor protein D53 OS=Homo sapiens GN=TPD52L1 PE=1 SV=1 TPD53_HUMAN</b>                                                        |           |           |          |        |         |           |   |                                                                                                                                                             |
| <b>peak 68</b>                                                                                                                   | 4468.1380 | 4467.1307 | 18.812   |        | 0.1914  | 1-40      | 1 | MEAQQAQGLLETEPLQGTDEDASADDFSSMLSEEEKEELKA : Phospho (ST); 2 Oxidation (M)                                                                                   |
| <b>peak 20</b>                                                                                                                   | 1709.3020 | 1708.2947 | 352.65   |        | -0.5337 | 41-54     | 0 | <b>KAELVQLEDEITTLRQ: Phospho (ST)</b>                                                                                                                       |
| <b>peak 22</b>                                                                                                                   | 1724.3610 | 1723.3537 | 258.407  |        | -0.1854 | 86-79     | 0 | KSWHDMQTTTAYKK : 2 Phospho (ST); Oxidation (M); Phospho (Y)                                                                                                 |
| <b>peak 18</b>                                                                                                                   | 1677.0210 | 1676.0137 | 57.74    |        | 0.3072  | 86-98     | 1 | KSWHDMQTTTAYKKT : Phospho (Y)                                                                                                                               |
| <b>peak 27</b>                                                                                                                   | 2013.2060 | 2012.1987 | 27.66    |        | 0.6320  | 86-98     | 1 | KSWHDMQTTTAYKKT : 4 Phospho (ST); Oxidation (M); Phospho (Y)                                                                                                |
| <b>peak 10</b>                                                                                                                   | 1283.9660 | 1282.9587 | 290.374  |        | 0.4170  | 124-133   | 1 | KKFGDMSYSIRH: Phospho (Y)                                                                                                                                   |
| <b>peak 38</b>                                                                                                                   | 2437.5350 | 2436.5277 | 32.159   |        | -0.2868 | 125-142   | 1 | KFGDMSYSIRHSIMPAMRN: 3 Phospho (ST); 2 Oxidation (M); Phospho (Y)                                                                                           |
| <b>peak 8</b>                                                                                                                    | 1109.860  | 1108.8527 | 57.87    |        | 0.3969  | 134-142   | 0 | RHSIMPAMRN + Phospho (ST)                                                                                                                                   |
| <b>peak 57</b>                                                                                                                   | 3334.4770 | 3333.4697 | 21.522   |        | 0.0033  | 163-195   | 1 | KTKVGGTNPNGGSFEEVLSSTAHASASLAGGSRR + 2 Phospho (ST)                                                                                                         |
